# Supplementary material
Source: Springer Nature journal article supplement (http://www.springermedizin.de/resource/supplementary/12958_2009_603_MOESM1_ESM.pdf/9568076)

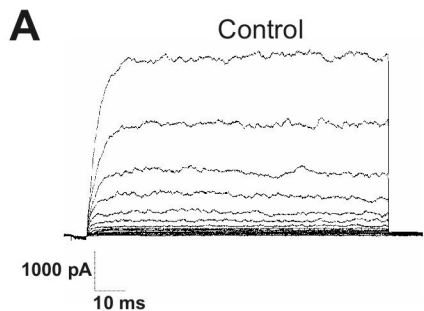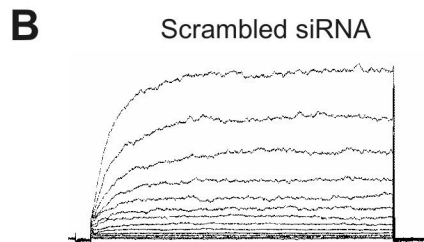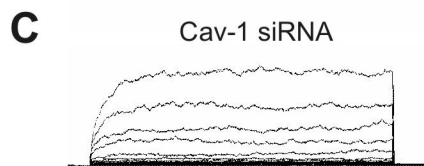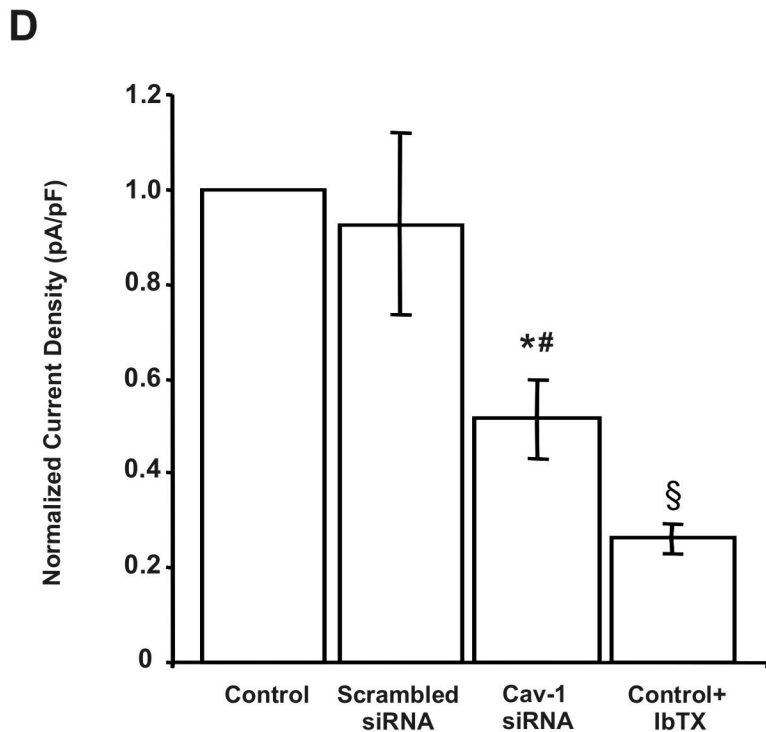

Supplement: MOESM1 [file 9568076]
